# Supplementary material
Source: publisher figshare collection journal article supplement (https://sage.figshare.com/ndownloader/files/14242442)
Supplement: Supplementary file 1 [file 14242442]

Archive with 9 entries (9 files):
- Supplemental material.pdf
- SuppTable1.PNG
- SuppTable2.PNG
- SuppTable3.PNG
- SuppTable4.PNG
- SuppTable5.PNG
- SuppTable6.PNG
- SuppTable7.PNG
- SuppTable8.PNG
