# Supplementary material
Source: publisher figshare collection journal article supplement (https://sage.figshare.com/ndownloader/files/14242442)

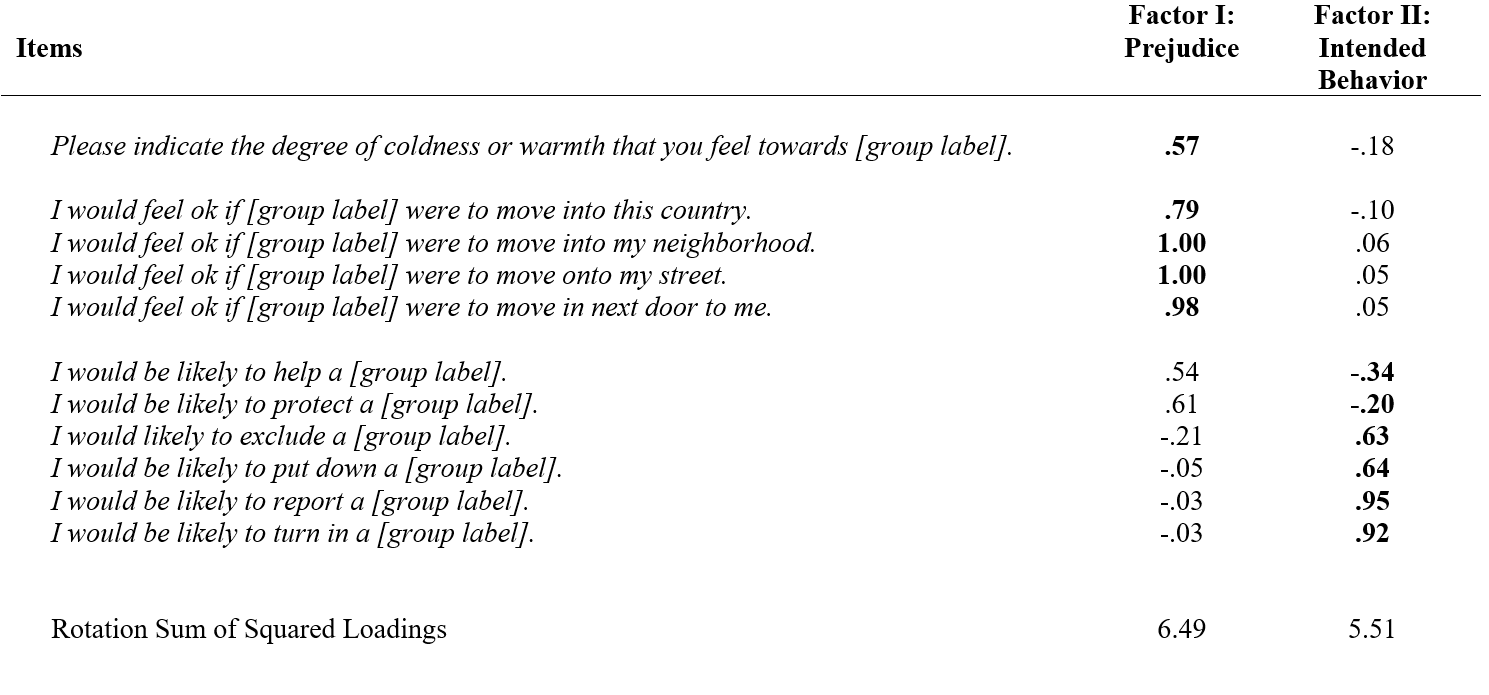

Supplement: Supplementary file 1 [file 14242442 › SuppTable1.PNG]

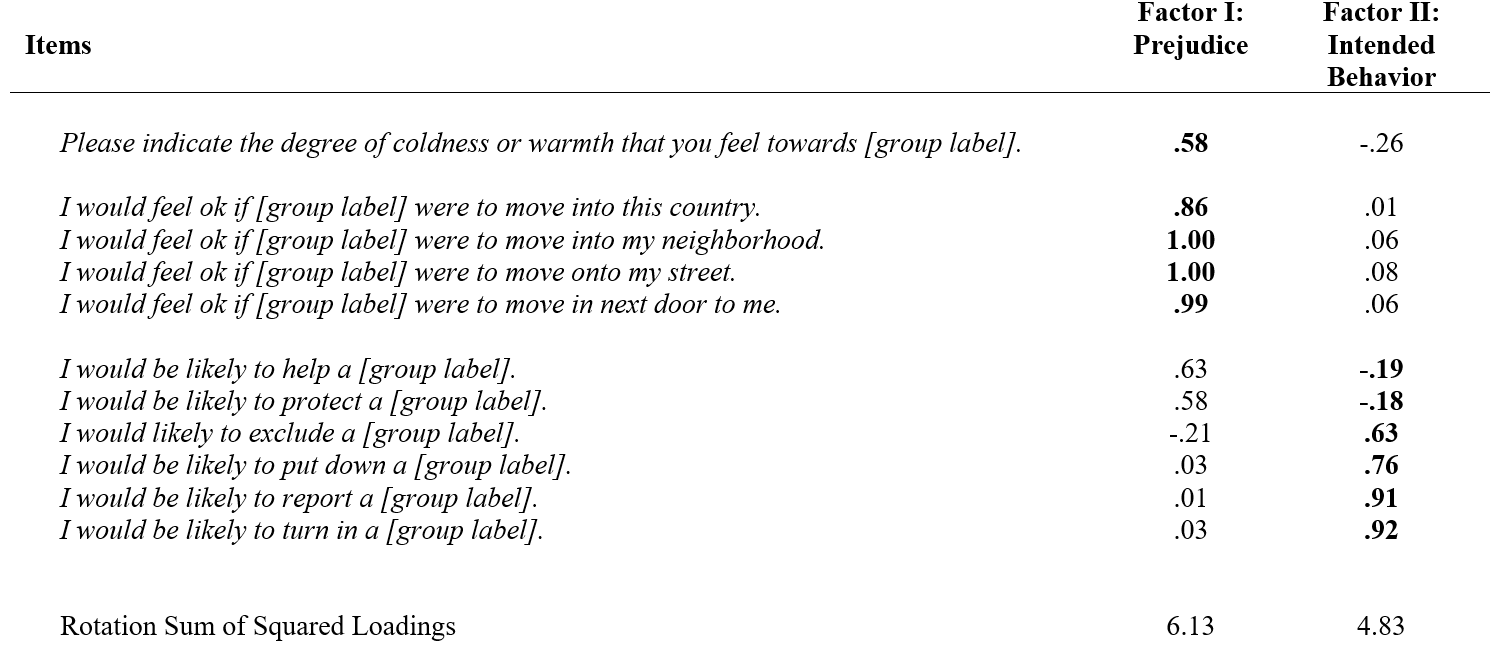

Supplement: Supplementary file 1 [file 14242442 › SuppTable2.PNG]

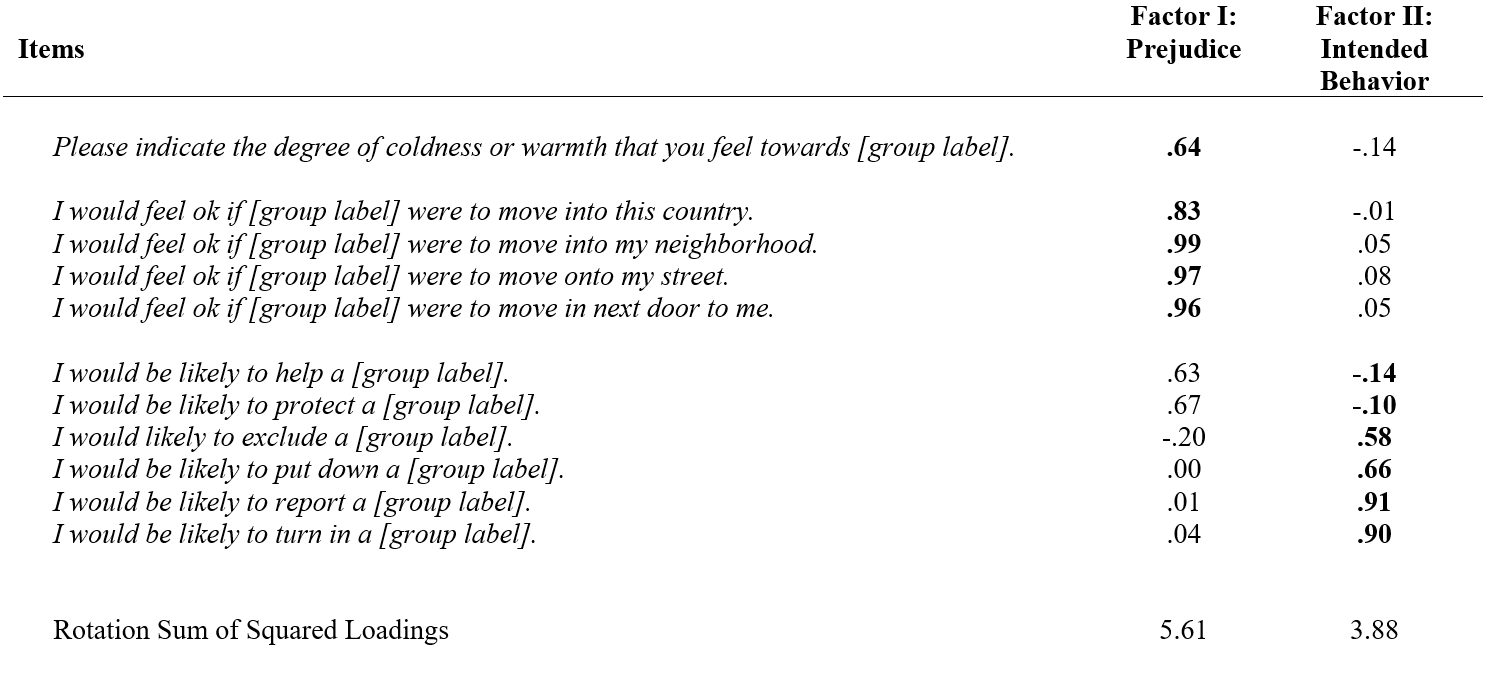

Supplement: Supplementary file 1 [file 14242442 › SuppTable3.PNG]

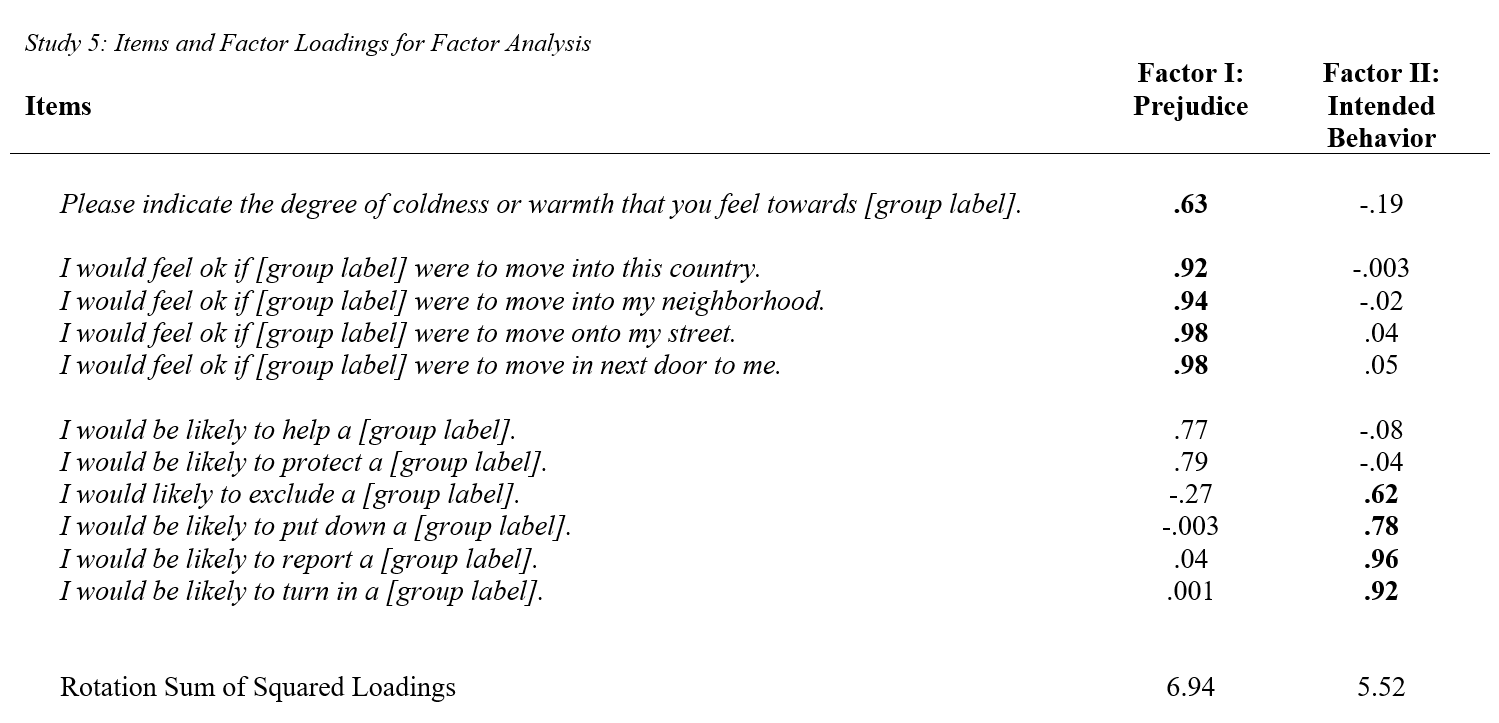

Supplement: Supplementary file 1 [file 14242442 › SuppTable4.PNG]

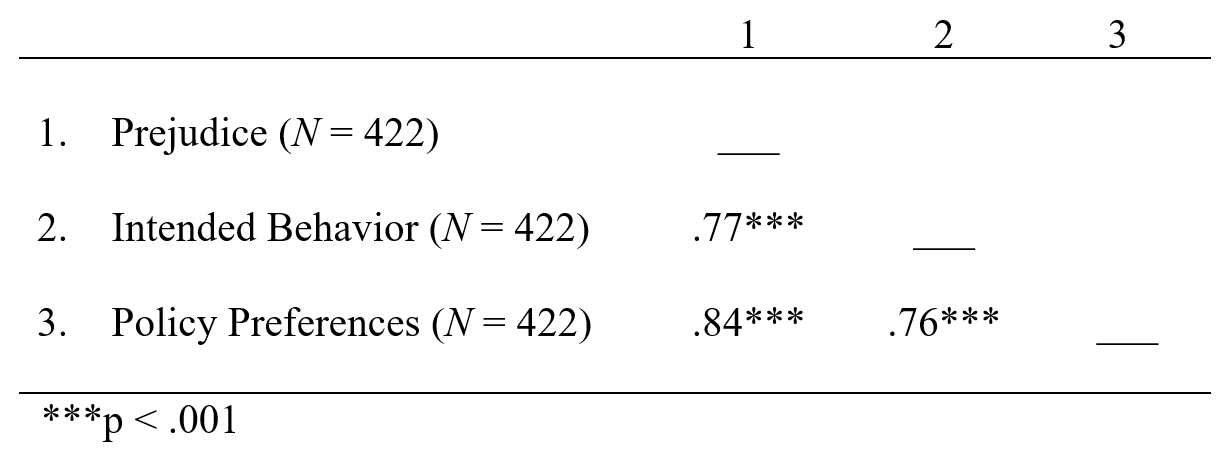

Supplement: Supplementary file 1 [file 14242442 › SuppTable5.PNG]

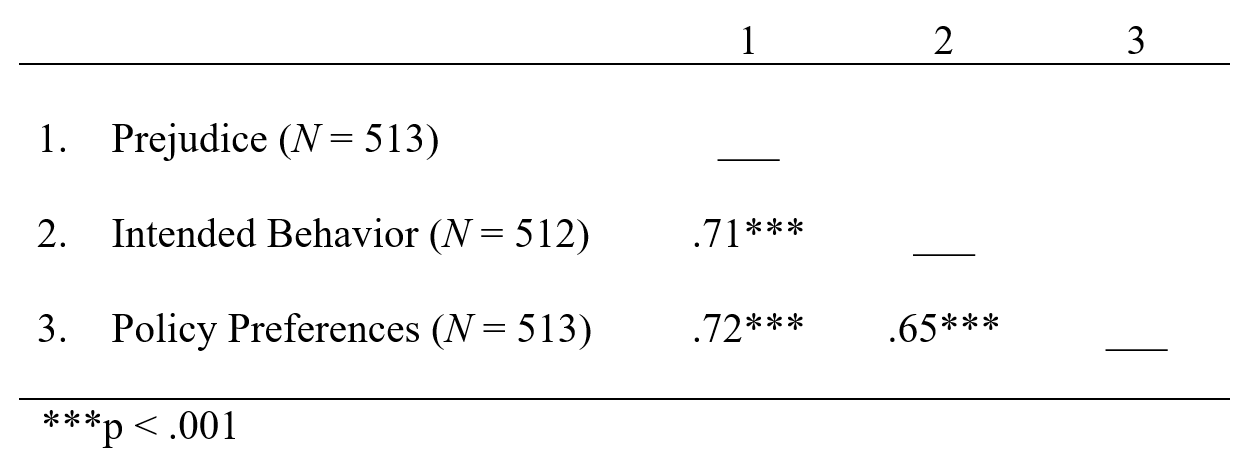

Supplement: Supplementary file 1 [file 14242442 › SuppTable6.PNG]

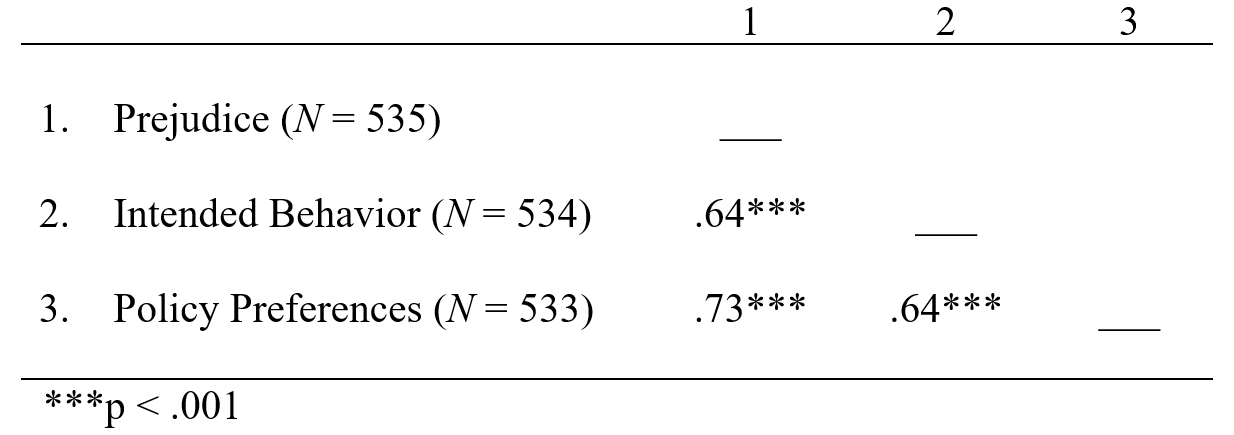

Supplement: Supplementary file 1 [file 14242442 › SuppTable7.PNG]

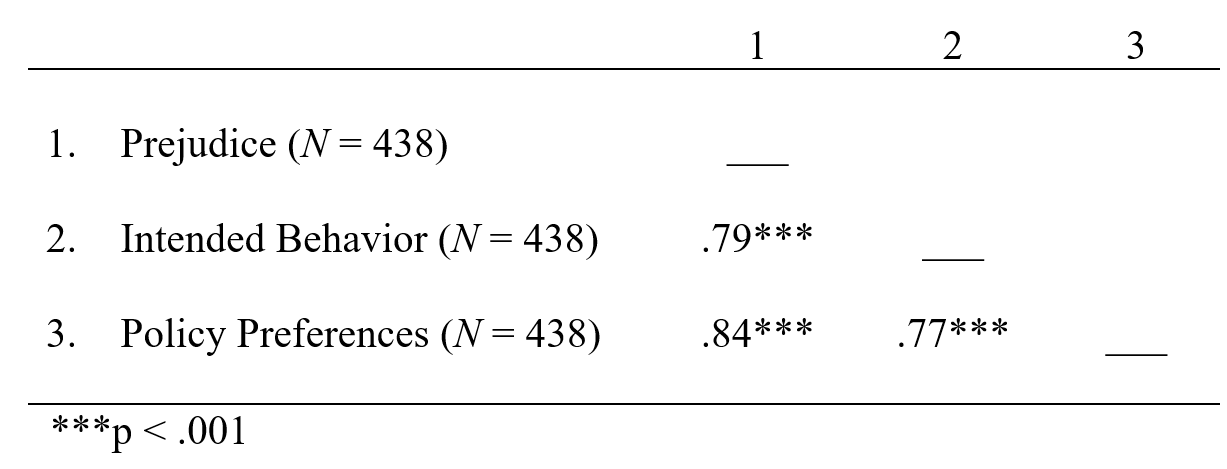

Supplement: Supplementary file 1 [file 14242442 › SuppTable8.PNG]
